# Supplementary material for: An m5C methylation regulator-associated signature predicts prognosis and therapy response in pancreatic cancer
Source: Front Cell Dev Biol. 2022 Aug 19;10:975684. doi: 10.3389/fcell.2022.975684 (PMC9437259; doi:10.3389/fcell.2022.975684)
Supplement: Supplementary file 14 [file Table7.XLSX]

## Sheet: Table S7
Table S7: Different set of PDAC patients
training set	testing set
TCGA-IB-7888	TCGA-FB-AAQ1
TCGA-2J-AABO	TCGA-HZ-8315
TCGA-FB-A5VM	TCGA-IB-7893
TCGA-2L-AAQE	TCGA-HZ-8003
TCGA-YH-A8SY	TCGA-2J-AABT
TCGA-M8-A5N4	TCGA-HV-A7OL
TCGA-IB-AAUU	TCGA-H6-A45N
TCGA-PZ-A5RE	TCGA-3A-A9IX
TCGA-IB-7897	TCGA-XD-AAUH
TCGA-HZ-8519	TCGA-HZ-A77O
TCGA-3A-A9IL	TCGA-IB-A5SO
TCGA-3E-AAAY	TCGA-F2-6879
TCGA-US-A77E	TCGA-3A-A9IV
TCGA-YY-A8LH	TCGA-3A-A9IR
TCGA-FB-A78T	TCGA-HV-AA8V
TCGA-HZ-8005	TCGA-Q3-A5QY
TCGA-2J-AAB9	TCGA-HZ-A9TJ
TCGA-XN-A8T5	TCGA-H6-8124
TCGA-L1-A7W4	TCGA-LB-A8F3
TCGA-US-A779	TCGA-IB-7654
TCGA-IB-7886	TCGA-2J-AAB8
TCGA-IB-8127	TCGA-FB-A4P6
TCGA-XN-A8T3	TCGA-3A-A9I5
TCGA-FB-AAQ0	TCGA-HZ-8638
TCGA-IB-AAUP	TCGA-HZ-7925
TCGA-3A-A9IH	TCGA-S4-A8RM
TCGA-3A-A9IO	TCGA-HZ-8317
TCGA-HZ-A4BH	TCGA-3A-A9I9
TCGA-3A-A9IC	TCGA-F2-6880
TCGA-IB-AAUN	TCGA-2L-AAQJ
TCGA-HZ-A8P1	TCGA-IB-A5ST
TCGA-2J-AABV	TCGA-3A-A9IU
TCGA-FB-AAPZ	TCGA-HV-AA8X
TCGA-2J-AABI	TCGA-HZ-A77Q
TCGA-IB-AAUO	TCGA-HZ-7924
TCGA-2J-AAB6	TCGA-HZ-7289
TCGA-2J-AABF	TCGA-HZ-7926
TCGA-2J-AAB1	TCGA-RB-AA9M
TCGA-HZ-8001	TCGA-2J-AABH
TCGA-IB-7651	TCGA-IB-7645
TCGA-HZ-7923	TCGA-2J-AABA
TCGA-HZ-A77P	TCGA-Q3-AA2A
TCGA-IB-7646	TCGA-FB-AAQ2
TCGA-HZ-7920	TCGA-2L-AAQM
TCGA-FB-AAPU	TCGA-IB-7649
TCGA-HZ-7922	TCGA-LB-A9Q5
TCGA-IB-A6UF	TCGA-S4-A8RO
TCGA-OE-A75W	TCGA-HZ-A49G
TCGA-F2-7276	TCGA-S4-A8RP
TCGA-HV-A5A5	TCGA-HZ-A49H
TCGA-2J-AABU	TCGA-IB-AAUM
TCGA-RB-A7B8	TCGA-IB-A5SS
TCGA-IB-A6UG	TCGA-HZ-8002
TCGA-FB-A7DR	TCGA-FB-AAQ6
TCGA-2L-AAQL	TCGA-HV-A5A6
TCGA-2J-AABR	TCGA-3E-AAAZ
TCGA-3A-A9I7	TCGA-IB-7885
TCGA-FB-AAPP	TCGA-HZ-8637
TCGA-XD-AAUL	TCGA-HV-A5A3
TCGA-F2-A44H	TCGA-3A-A9IZ
TCGA-IB-7644	TCGA-3A-A9IN
TCGA-IB-AAUW	TCGA-US-A77J
TCGA-HZ-7919	TCGA-2J-AABE
TCGA-F2-7273	TCGA-3A-A9J0
TCGA-XD-AAUG	TCGA-IB-AAUQ
TCGA-HZ-A4BK	TCGA-HZ-7918
TCGA-IB-7889	TCGA-IB-7887
TCGA-IB-AAUR	TCGA-IB-A5SP
TCGA-IB-A7M4	TCGA-F2-A7TX
TCGA-FB-AAPS	TCGA-3A-A9IB
TCGA-LB-A7SX	TCGA-2L-AAQI
TCGA-IB-AAUS	TCGA-3A-A9IS
TCGA-HV-A7OP	TCGA-IB-AAUT
TCGA-IB-7652	TCGA-Z5-AAPL
TCGA-US-A774	TCGA-US-A776
TCGA-IB-8126	TCGA-2J-AAB4
TCGA-F2-A44G	TCGA-IB-AAUV
TCGA-RL-AAAS	TCGA-FB-AAQ3
TCGA-FB-A545	TCGA-IB-7890
TCGA-3A-A9IJ	TCGA-XD-AAUI
TCGA-F2-A8YN	TCGA-2J-AABK
TCGA-HZ-8636	TCGA-HZ-A49I
TCGA-FB-AAPY	TCGA-HV-A5A4
TCGA-2L-AAQA	TCGA-FB-A4P5
TCGA-IB-A5SQ	TCGA-H8-A6C1
TCGA-FB-AAPQ	TCGA-2J-AABP
GSM1383779	TCGA-US-A77G
GSM1383780	TCGA-IB-A7LX
GSM1383784	TCGA-IB-7891
GSM1383786	TCGA-YB-A89D
GSM1383788	GSM1383778
GSM1383792	GSM1383781
GSM1383793	GSM1383782
GSM1383797	GSM1383783
GSM1383798	GSM1383785
GSM1383802	GSM1383787
GSM1383804	GSM1383789
GSM1383805	GSM1383790
GSM1383806	GSM1383791
GSM1383807	GSM1383794
GSM1383809	GSM1383795
GSM1383810	GSM1383796
GSM1383811	GSM1383799
GSM1383814	GSM1383800
GSM1383815	GSM1383801
GSM1383817	GSM1383803
GSM1383819	GSM1383808
GSM1383820	GSM1383812
GSM1383823	GSM1383813
GSM1383824	GSM1383816
GSM1383827	GSM1383818
GSM1383828	GSM1383821
GSM1383830	GSM1383822
GSM1383832	GSM1383825
GSM1383833	GSM1383826
GSM1383834	GSM1383829
GSM1383835	GSM1383831
GSM1383836	GSM1383838
GSM1383837	GSM1383840
GSM1383839
